# Supplementary material for: Long-Term Treatment Outcome of Progressive Mycobacterium avium Complex Pulmonary Disease
Source: MDPI journal article supplement (doi:10.3390/jcm9051315), 2020-05-02
Supplement: s1 [file s1]

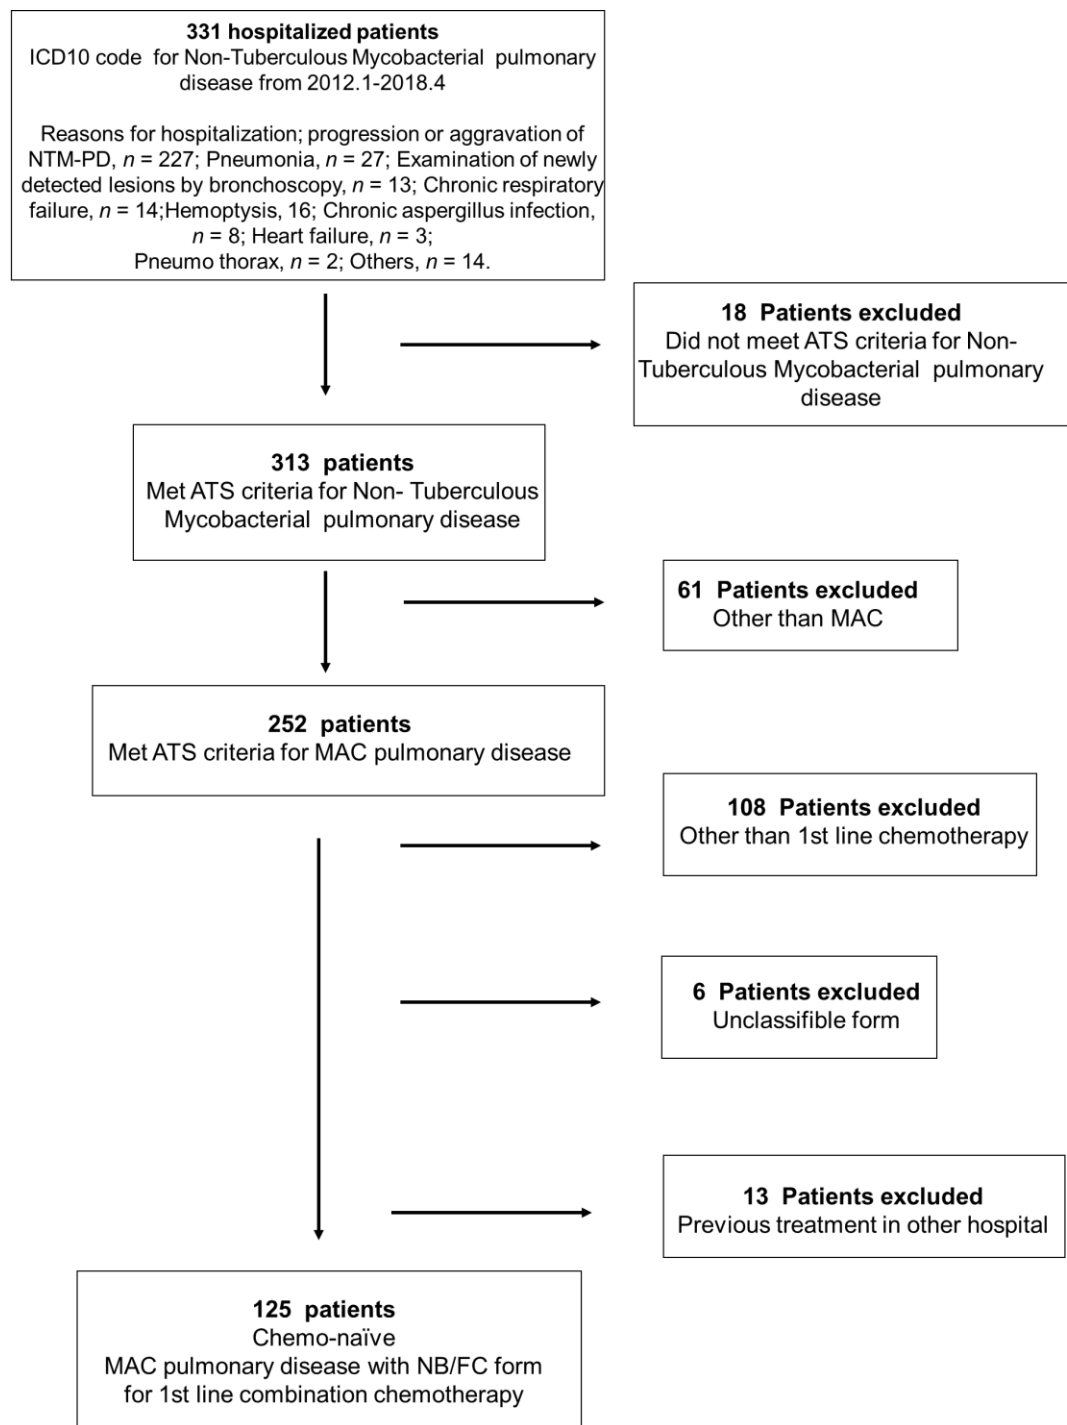

**Figure S1.** Study design. ICD 10, international classification of disease 10; ATS, American Thoracic Society; NTM-PD; non-tuberculous mycobacterial pulmonary disease; MAC, *Mycobacterium avium* complex; NB, nodular bronchiectasis; FC, fibrocavitary.

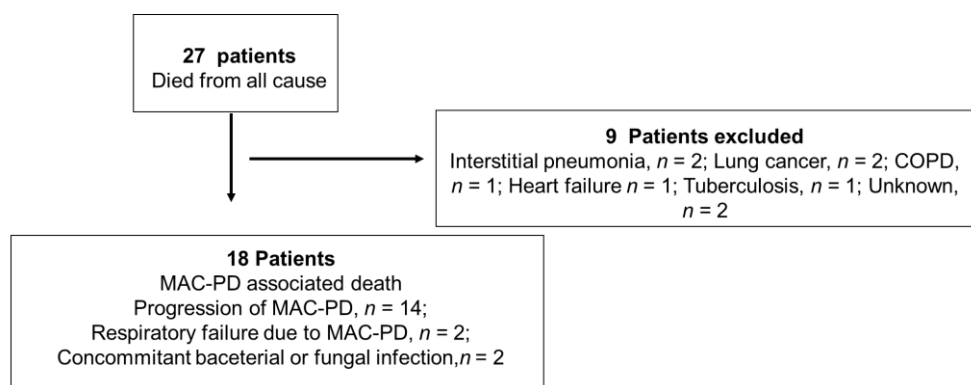

**Figure S2.** Analysis of MAC-PD associated death. COPD, chronic obstructive pulmonary disease; MAC-PD, *Mycobacterium avium* complex pulmonary disease.
